# Supplementary material for: Volumetric MRI data correlate to disease severity in metachromatic leukodystrophy
Source: PubMed Central journal article supplement — Ann Clin Transl Neurol. 2015 Aug 24;2(9):932–40. doi: 10.1002/acn3.232 (PMC4574810; doi:10.1002/acn3.232), 2015-08-24
Supplement: acn30002-0932-sd1.pdf [file acn30002-0932-sd1.pdf]

**Supplementary Table 1: Clinical and genetic data of patient cohort**

| Patient ID | Sex | MLD classification | Age at MRI (y) | Age at onset (y) | GMFC-MLD       | Mutation 1          |               | Mutation 2          |               | FSIQ              |
|------------|-----|--------------------|----------------|------------------|----------------|---------------------|---------------|---------------------|---------------|-------------------|
|            |     |                    |                |                  |                | cDNA level          | protein level | cDNA level          | protein level |                   |
| MLD1       | m   | Adult              | 28             | 27               | 0              | c.251G>A            | p.Arg84Gln    | c.287C>T            | p.Ser96Phe    | 72                |
| MLD2       | f   | Juvenile           | 8              | 8                | 1              | c.459+1G>A          | p.?           | c.1277C>T           | p.Pro426Leu   | 65                |
| MLD3       | m   | Juvenile           | 7              | 5                | 1              | c.459+1G>A          | p.?           | c.1277C>T           | p.Pro426Leu   | 71                |
| MLD4       | f   | Juvenile           | 6              | 5                | 1              | c.634G>C            | p.Ala212Pro   | c.1277C>T           | p.Pro426Leu   | 68                |
| MLD5       | f   | Juvenile           | 14             | 14               | 1              | c.1277C>T           | p.Pro426Leu   | c.1277C>T           | p.Pro426Leu   | 94                |
| MLD6       | f   | Adult              | 35             | 35               | 0              | c.251G>A            | p.Arg84Gln    | c.287>C>T           | p.Ser96Phe    | 87                |
| MLD7       | f   | Juvenile           | 6              | n.a.             | 0              | c.459+1G>A          | p.?           | c.536T>G            | p.Ile179Ser   | n.a.              |
| MLD8       | m   | Adult              | 17             | 17               | 0              | c.635C>T            | p.Ala212Val   | c.1277C>T           | p.Pro426Leu   | 100               |
| MLD9       | f   | Juvenile           | 15             | 14               | 1              | c.635C>T            | p.Ala212Val   | c.1277C>T           | p.Pro426Leu   | 65                |
| MLD10      | m   | Late-infantile     | 2              | 1.5              | 6              | c.1069C>T           | p.Gln232*     | c.1216G>T           | p.Asp281Tyr   | n.a.              |
| MLD11      | f   | Juvenile           | 7              | 6                | 1              | c.1277C>T           | p.Pro426Leu   | c.1372C>T           | p.Gln458*     | 61                |
| MLD12      | f   | Adult              | 26             | 30               | 0              | c.536T>G            | p.Ile170Ser   | c.1171A>G           | p.Ser391Gly   | n.a.              |
| MLD13      | f   | Juvenile           | 6              | 4                | 5              | n.a.                |               | n.a.                |               | n.a.              |
| MLD14      | f   | Adult              | 25             | 25               | 0              | c.459+1G>A          | p.?           | c.536T>G            | p.Ile179Ser   | 91                |
| MLD15      | f   | Late-infantile     | 2              | 1.6              | 2              | c.459+1G>A          | p.?           | c.830_831delTCinsAA | p.Ile277Lys   | 101 <sup>++</sup> |
| MLD16      | m   | Late-infantile     | 2              | 1.3              | 2 <sup>+</sup> | c.245C>T            | p.Pro82Leu    | c.1168C>T           | p.Arg390Trp   | 111 <sup>++</sup> |
| MLD17      | f   | Juvenile           | 7              | 5                | 1              | c.830_831delTCinsAA | p.Ile277Lys   | c.1277C>T           | p.Pro426Leu   | 74                |
| MLD18      | f   | Juvenile           | 12             | 11               | 1              | c.1277C>T           | p.Pro426Leu   | c.1277C>T           | p.Pro426Leu   | n.a.              |
| MLD19      | f   | Adult              | 32             | 27               | 0              | c.571C>A            | p.Pro191Thr   | c.1277C>T           | p.Pro426Leu   | 53                |
| MLD20      | f   | Juvenile           | 7              | 6                | 1              | c.459+1G>A          | p.?           | c.1277C>T           | p.Pro426Leu   | 63                |

<sup>+</sup> motor problems secondary to severe demyelinating polyneuropathy

<sup>++</sup> developmental index

FSIQ: Full Scale IQ

n.a. not available

**Supplementary Figure 1: Correction method in MLD**

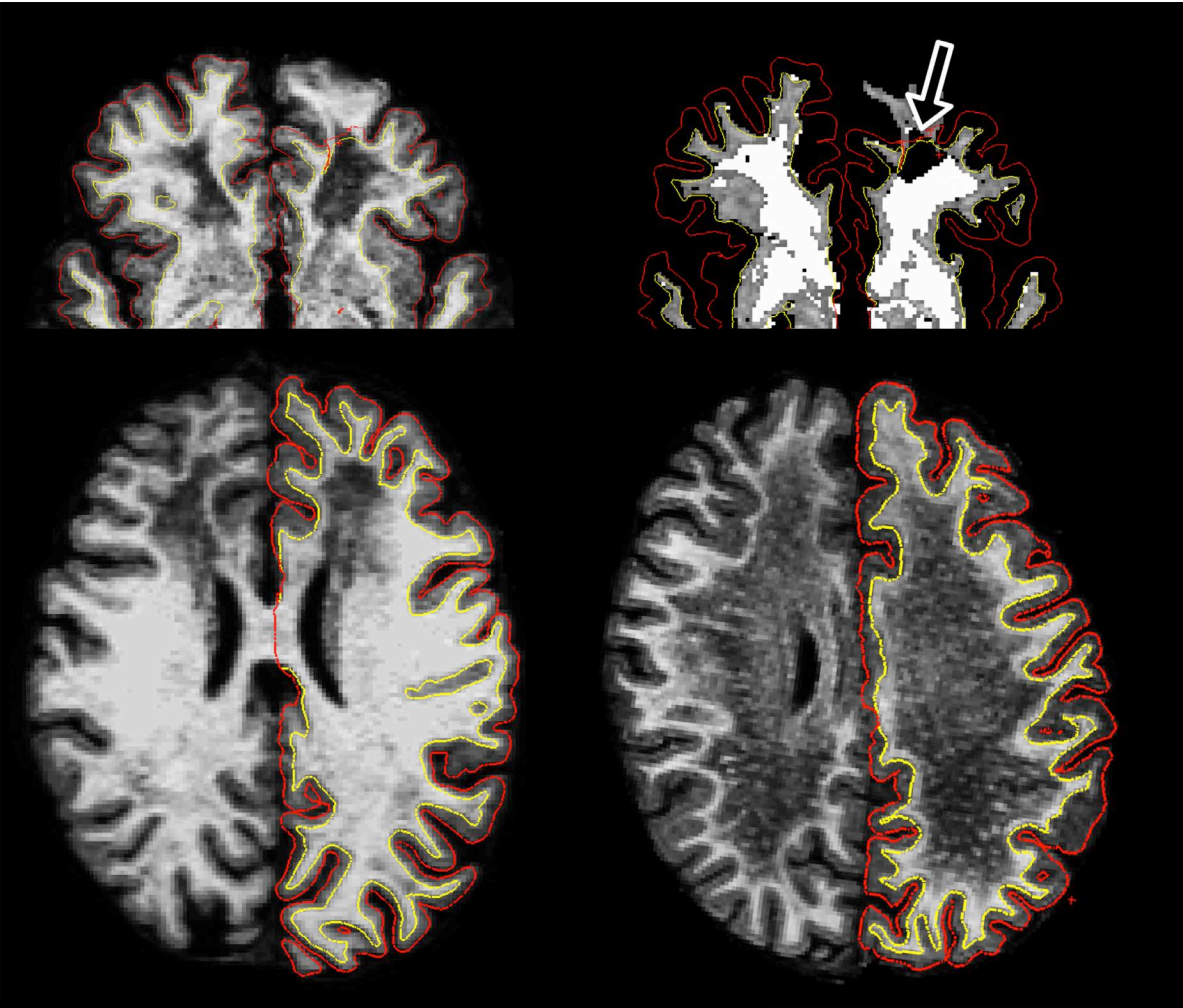

Examples of correction method in MLD patients. In the upper panel, an example is shown where the initial processing resulted in significant errors in the frontal lobe. On the upper right hand image the area not recognized as WM (arrow) was filled and subsequent segmentation was without difficulty. In the bottom panel, two examples are provided after this filling method, showing successful outlining of the left hemisphere surfaces in MLD patients. (yellow – white surface, red – pial surface).
